# Supplementary material for: Targeting mechanistic target of rapamycin complex 2 attenuates immunopathology in Systemic Lupus Erythematosus
Source: PubMed Central journal article supplement — bioRxiv. 2024 Aug 4:2024.08.01.606069. Preprint. [Version 1] doi: 10.1101/2024.08.01.606069 (PMC11312597; doi:10.1101/2024.08.01.606069), 2024-08-04

## 606 **Supplementary Methods**

### 607 Flow cytometry

608 The following antibodies were used in flow cytometry: anti-B220 (RA3-6B2), anti-CD4 (GK1.5),  
609 anti-CD8a (53-6.7), anti-CD25 (PC16), anti-CD38 (90), anti-CD69 (H1.2F3), anti-GL7 (GL-7),  
610 anti-CD138 (281-2), anti-IgD (11-26c.2a), anti-CD95 (Jo2), anti-PD-1 (J43), anti-IgM (II/41), and  
611 anti-CD162 (2PH1). CXCR5 and PNA were stained with biotinylated anti-CXCR5 (2G8) or  
612 biotinylated peanut agglutinin (FL10-71), followed by staining with streptavidin-conjugated PE  
613 (BD Biosciences).

614

### 615 SCIENTH method

616 Cells were rested in complete medium at 37°C for 30 minutes before equally divided into four  
617 parts and seeded into 96 well plates. Wells were treated with vehicle or the following metabolic  
618 inhibitors for 15 minutes, 2-Deoxy-D-Glucose (2-DG, 100 mM), Oligomycin (Oligo, 1 mM), or a  
619 sequential combination of the two. Puromycin (10 µg/ml) was then added to each treated well for  
620 15 minutes. Cells were then washed with ice-cold PBS and stained with Fc receptors and viability  
621 dye at RM for 15 minutes. Cells were then stained with surface markers in FACS buffer at RM for  
622 20 minutes. Following washing, cells were fixed and permeabilized using the FOXP3 fixation and  
623 permeabilization kit (Biolegend) following the manufacturer's instructions. Cells were next  
624 stained with anti-Puromycin AF647 (Sigma Aldrich, clone 12D10), resuspended in FACS buffer  
625 and read on an Attune NxT (ThermoFisher) cytometer.

626

### 627 T-B coculture assay

628 CD4<sup>+</sup> T cells were first enriched from the healthy or SLE donor PMBC using an enrichment kit  
629 (STEMCELL, Cat# 17952). The B220-CD3<sup>+</sup>CD4<sup>+</sup>CXCR5<sup>+</sup>PD-1<sup>+</sup>CXCR3<sup>-</sup> cells were sorted as  
630 Tfh-like cells. Tfh cells (3×10<sup>4</sup> cells/well) were cultured with anti-human RICTOR- or Ctrl-ASO  
631 (10 nm), IL2 (100 U/ml), and IL7 (10 ng/ml) for 5 days. CD19<sup>+</sup> B cells were next enriched from  
632 same donor PBMC using an enrichment kit (STEMCELL, Cat# 17854). CD19<sup>+</sup>IgD<sup>-</sup>CD27<sup>+</sup>  
633 CD38<sup>-</sup> cells were next sorted as memory B cells (2×10<sup>4</sup> cells/well) and seeded to coculture with  
634 ASO treated Tfh cells in the presence of staphylococcal enterotoxin B (SEB, 100ng/ml, Toxin  
635 Technology) for 7 days.

636 **Supplementary Table 1. Demographic and clinical characteristics of SLE patients\***

| <b>Patient</b>              | <b>1</b>           | <b>2</b>           | <b>3</b>           | <b>4</b>           | <b>5</b>           |
|-----------------------------|--------------------|--------------------|--------------------|--------------------|--------------------|
| <b>Age (years)</b>          | 57                 | 36                 | 55                 | 67                 | 53                 |
| <b>Gender</b>               | Female             | Male               | Female             | Female             | Female             |
| <b>Race/Ethnicity</b>       | White non-Hispanic |
| <b>SLE duration (Years)</b> | 28                 | 12                 | 7                  | 12                 | 19                 |
| <b>SLEDAI 2k Score</b>      | 9                  | 10                 | 10                 | 4                  | 0                  |
| <b>Autoantibodies</b>       |                    |                    |                    |                    |                    |
| <b>ANA</b>                  | +                  | +                  | +                  | +                  | +                  |
| <b>Anti-Sm</b>              | -                  | +                  | -                  | +                  | -                  |
| <b>Anti-RNP</b>             | +                  | -                  | -                  | +                  | -                  |
| <b>Anti-Ro</b>              | +                  | -                  | -                  | -                  | -                  |
| <b>Anti-La</b>              | +                  | -                  | -                  | -                  | -                  |
| <b>Anti-dsDNA</b>           | +                  | +                  | -                  | -                  | -                  |
| <b>aCL IgM / IgG</b>        | -                  | Not available      | Not available      | +/+                | -                  |
| <b>β2GP1 I IgM / IgG</b>    | -                  | Not available      | Not available      | -                  | -                  |
| <b>Lupus anticoagulant</b>  | -                  | Not available      | Not available      | -                  | +                  |
| <b>Complement C3/4</b>      | Low                | Normal             | Normal             | Normal             | Normal             |
| <b>Organ Involvement</b>    |                    |                    |                    |                    |                    |
| <b>Joints</b>               | +                  | +                  | +                  | +                  | +                  |
| <b>Constitutional</b>       | -                  | -                  | -                  | -                  | -                  |
| <b>Hematologic</b>          | +                  | -                  | -                  | -                  | +                  |
| <b>Mucocutaneous</b>        | -                  | +                  | +                  | -                  | +                  |
| <b>Kidney</b>               | -                  | -                  | -                  | -                  | -                  |
| <b>Serosal</b>              | +                  | -                  | -                  | -                  | -                  |
| <b>Neuropsychiatric</b>     | -                  | -                  | -                  | -                  | -                  |
| <b>Treatments</b>           |                    |                    |                    |                    |                    |
| <b>Glucocorticoids</b>      | +                  | +                  | -                  | +                  | -                  |
| <b>HCQ</b>                  | +                  | -                  | +                  | +                  | +                  |
| <b>Mycophenolate</b>        | -                  | -                  | -                  | -                  | -                  |
| <b>Methotrexate</b>         | -                  | -                  | +                  | +                  | -                  |
| <b>Azathioprine</b>         | -                  | -                  | -                  | +                  | +                  |
| <b>Others</b>               | None               | None               | None               | None               | None               |

637

638 \*All patients met ACR/EULAR SLE criteria.

639 Abbreviations: ANA=antinuclear antibodies; dsDNA=anti-double-stranded DNA antibody;  
640 RNP=anti-Ribonucleoprotein antibody. Sm=anti-Smith antibody; Ro=anti-Ro antibody; La=anti-  
641 La antibody; SCL70= anti-topoisomerase I; RF= Rheumatoid Factor. ACCP= Anti-cyclic  
642 citrullinated peptide, aCL = anticardiolipin; anti- $\beta$ 2GPI = anti- $\beta$ 2-glycoprotein I, HCQ=  
643 Hydroxychloroquine.  
644

645 **Supplementary figure legend**

646 **Supplementary Figure 1: Flow analysis of splenocyte cell populations in IMQ mice.**

647 (A) Expression of GL7 and IgD in splenocyte. Right, frequency of GL7-IgD<sup>+</sup> naïve B cells. (B)  
648 Expression of CD21 and CD23 in splenocyte. Right, frequency of CD21<sup>+</sup>CD23<sup>-</sup> marginal zone B  
649 cells. (C) Expression of Bcl6 and B220 in splenocyte. Right, frequency of B220<sup>+</sup>Bcl6<sup>+</sup> cells. (D)  
650 Expression of CD11c and B220 in splenocyte. Right, frequency of CD11c<sup>+</sup>B220<sup>+</sup> cells. (E)  
651 Expression of Foxp3 and CD4 in splenocyte. Right, frequency of Foxp3<sup>+</sup> cells within CD4<sup>+</sup> cells.  
652 (F) Expression of T-bet and CD4 in splenocyte. Right, frequency of CD4<sup>+</sup>T-bet<sup>+</sup> cells within CD4<sup>+</sup>  
653 cells. (G) Expression of Ly6C and B220 in splenocyte. Right, frequency of B220<sup>+</sup>Ly6C<sup>+</sup> pDC cells.  
654 (H) Expression of CD11c and CD11b in splenocyte. Right, frequency of CD11c<sup>+</sup> CD11b<sup>+</sup> cDC  
655 cells. (I) Expression of Ly6C and CD11b in splenocyte. Right, frequency of CD11b<sup>+</sup>Ly6C<sup>+</sup>  
656 monocytes. (J) Expression of Ly6G and CD11b in splenocyte. Right, frequency of CD11b<sup>+</sup>Ly6G<sup>+</sup>  
657 neutrophils. \*p < 0.05, \*\*p < 0.01, \*\*\*p < 0.001. p-Values were calculated with unpaired student  
658 t-tests. Error bars represent SEM.

659

660 **Supplementary Figure 2: Flow analysis of peripheral lymphocytes in *Lpr-Ifnar1<sup>-/-</sup>* mice.**

661 (A) Expression of CD69 and CD4 in pLN derived lymphocytes. Left, frequency of CD4<sup>+</sup>CD69<sup>+</sup>  
662 population; right absolute cell number of CD4<sup>+</sup>CD69<sup>+</sup> cells in pLN. (B) Expression of B220 and  
663 CD4 in pLN derived lymphocytes. Left, frequency of CD4<sup>+</sup>B220<sup>-</sup> population; right absolute cell  
664 number of CD4<sup>+</sup>B220<sup>-</sup> cells in pLN. (C) Expression of B220 and CD138 in pLN derived  
665 lymphocytes. Left, frequency of B220<sup>+</sup>CD138<sup>hi</sup> population; right absolute cell number of  
666 B220<sup>+</sup>CD138<sup>hi</sup> cells in pLN. (D) Expression of B220 and Bcl6 in pLN derived lymphocytes. Right,  
667 frequency of B220<sup>+</sup>Bcl6<sup>+</sup> population in pLN. (E) Expression of ICOS on CD4<sup>+</sup> cells in pLN. (F)

668 Expression of Foxp3 and CD4 in pLN derived lymphocytes. Left, frequency of CD4<sup>+</sup>Foxp3<sup>+</sup>  
669 population; right absolute cell number of CD4<sup>+</sup>Foxp3<sup>+</sup> cells in pLN. (G) Expression of CXCR5  
670 and Bcl6 in pLN derived lymphocytes. Upper left, frequency of CXCR5<sup>+</sup>Bcl6<sup>+</sup> population; upper  
671 right, absolute cell number of CXCR5<sup>+</sup>Bcl6<sup>+</sup> cells in pLN. Lower left, frequency of CXCR5<sup>+</sup>Bcl6<sup>-</sup>  
672 population; lower right, absolute cell number of CXCR5<sup>+</sup>Bcl6<sup>-</sup> cells in pLN. Results were pooled  
673 from at least 3 independent experiments. ns, not significant; \*p < 0.05, \*\*p < 0.01, \*\*\*p < 0.001,  
674 \*\*\*\*p < 0.0001. p-Values were calculated with one-way ANOVA with the post-hoc Tukey test.  
675 Error bars represent SEM.

676

677 **Supplementary Figure 3: Flow analysis of peripheral lymphocytes in Ctrl-/RICTOR-ASO**  
678 **treated MRL/lpr mice.** (A) Peripheral lymph node size (left) and derived lymphocyte cell  
679 numbers (Right) in treated mice. (B) Expression of CD4 and CD8 in pLN derived lymphocytes.  
680 Right, percentage of CD4<sup>+</sup> population in pLN. (C) Expression of CD4 and CD69 in pLN derived  
681 lymphocytes. Right, frequency of CD4<sup>+</sup>CD69<sup>+</sup> population in pLN. \*p < 0.05, \*\*p < 0.01. p-Values  
682 were calculated with unpaired student t-tests. Error bars represent SEM.

683

684 **Supplementary Figure 4: Supernatant immunoglobulin isotypes concentration of T-B culture**  
685 **derived from healthy donor PBMCs.** ns, not significant, \*p < 0.05, \*\*p < 0.01. p-Values were  
686 calculated with paired t-tests. Error bars represent SEM.

## Supplementary Figure 1

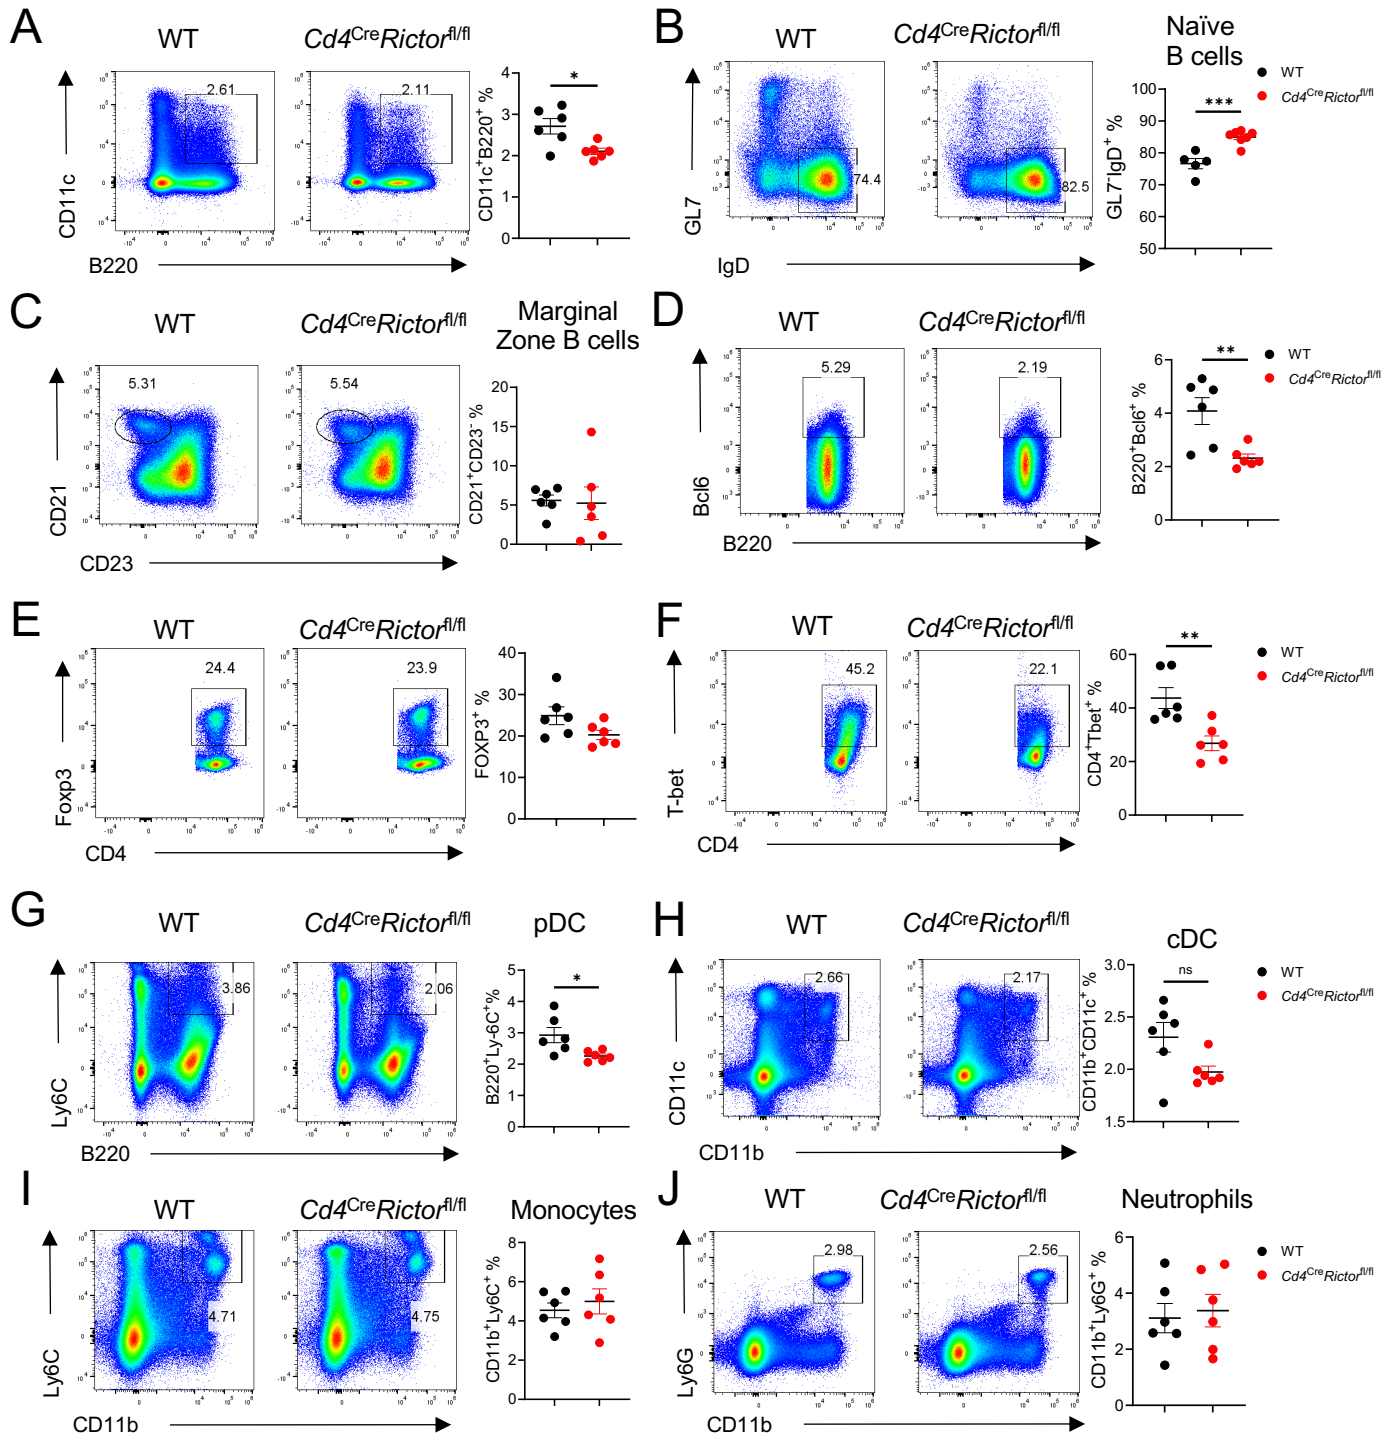

# Supplementary Figure 2

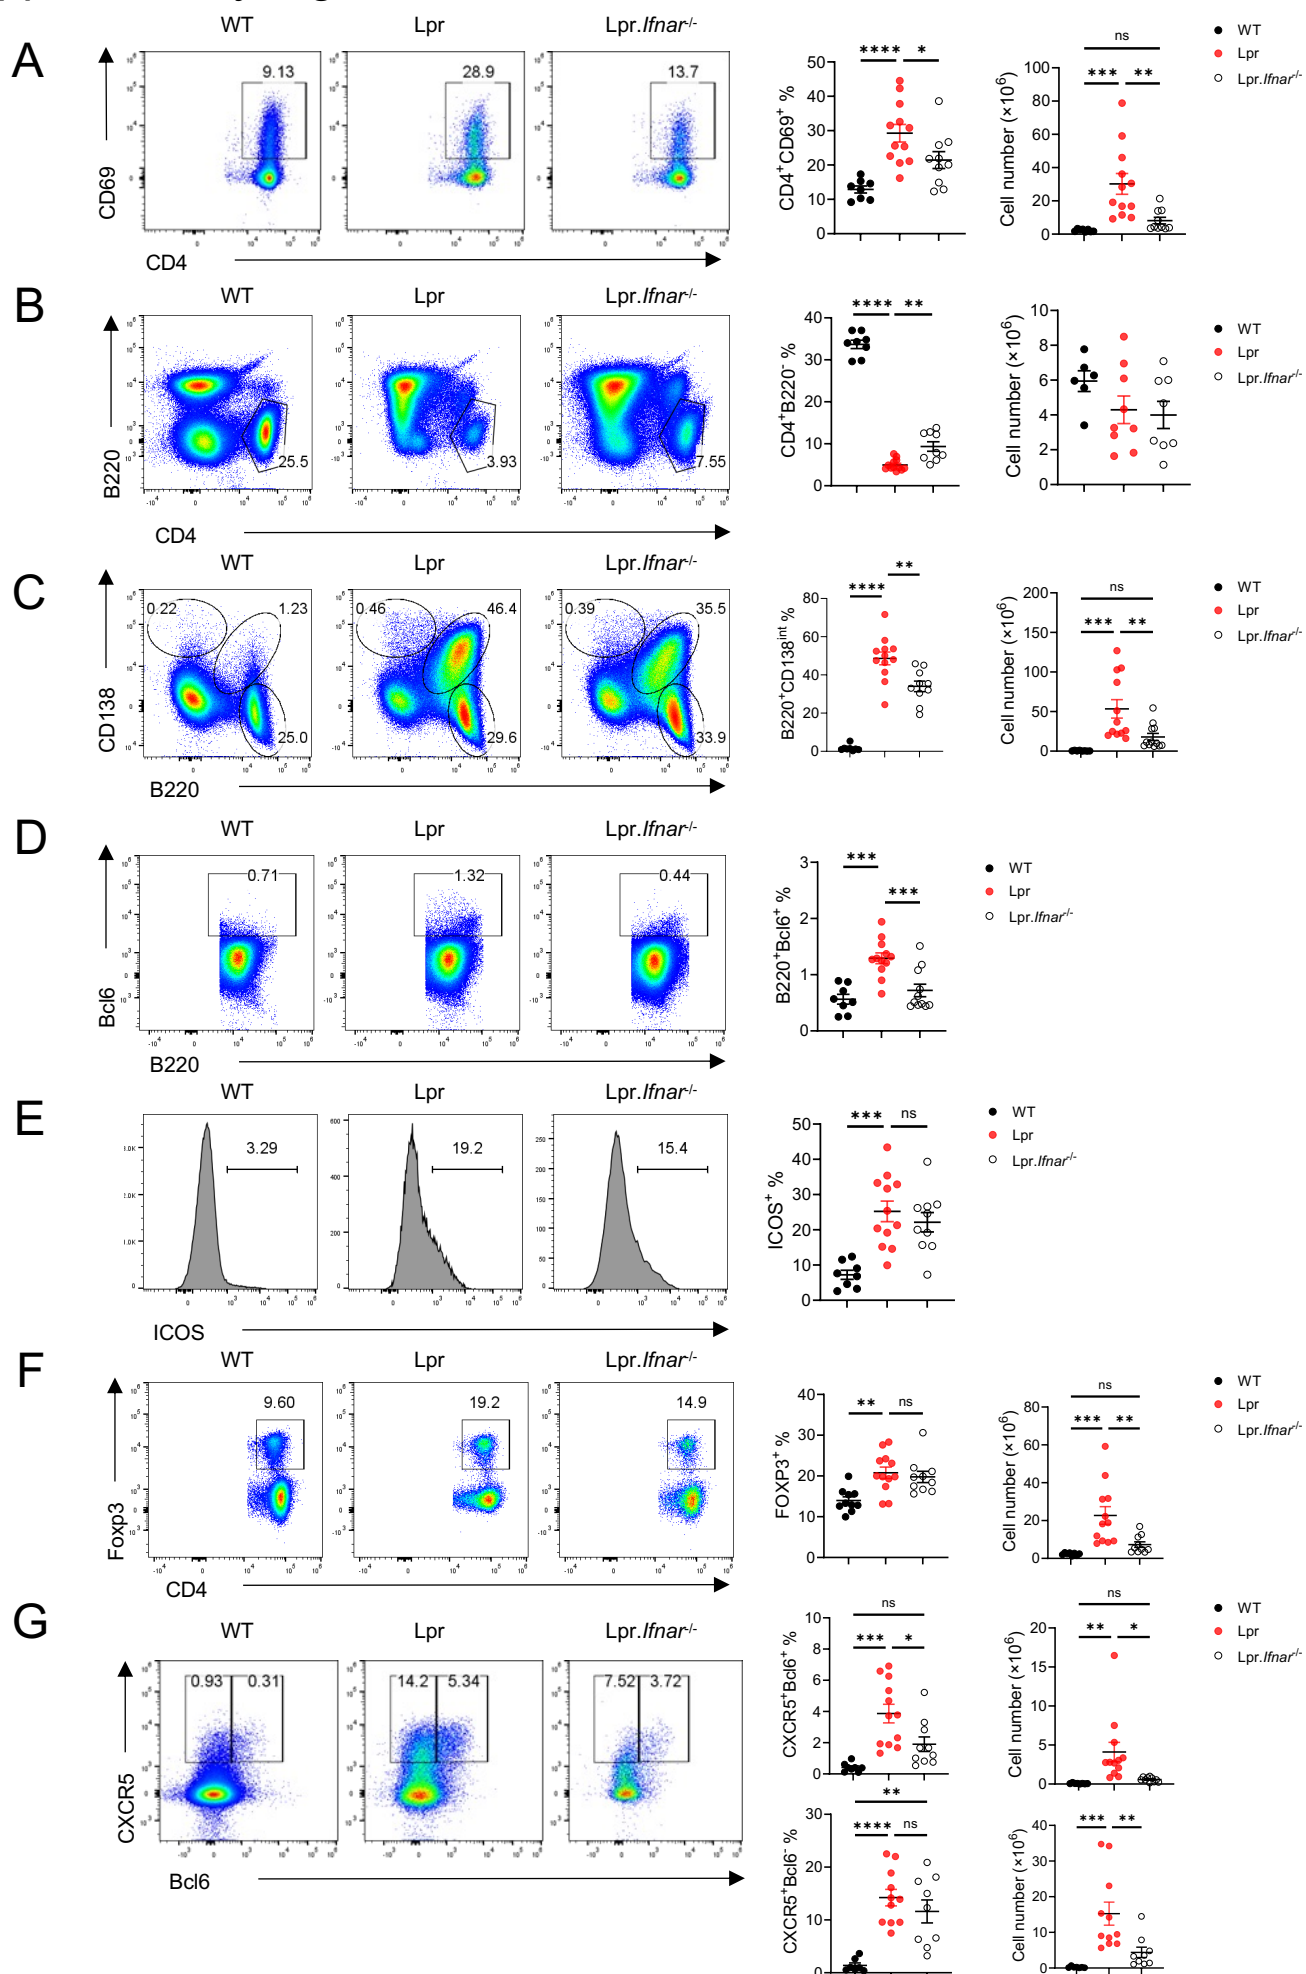



## Supplementary Figure 3

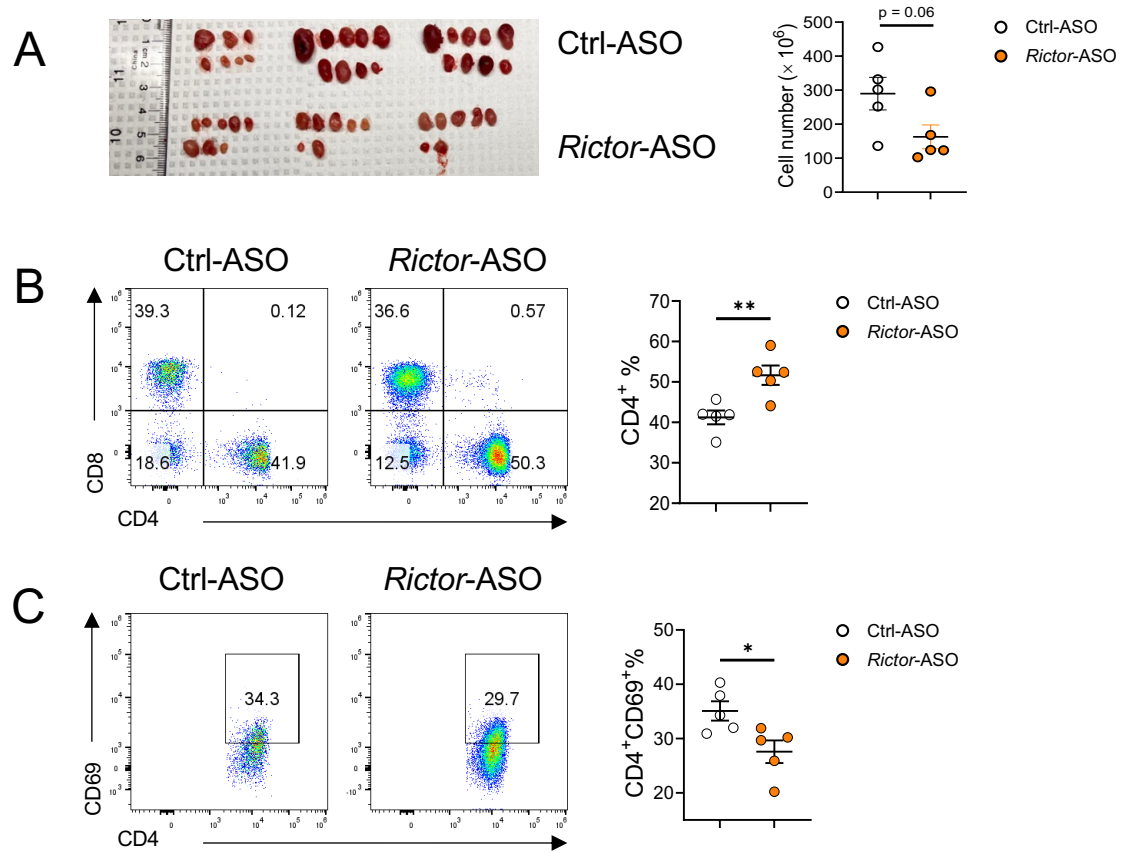

## Supplementary Figure 4

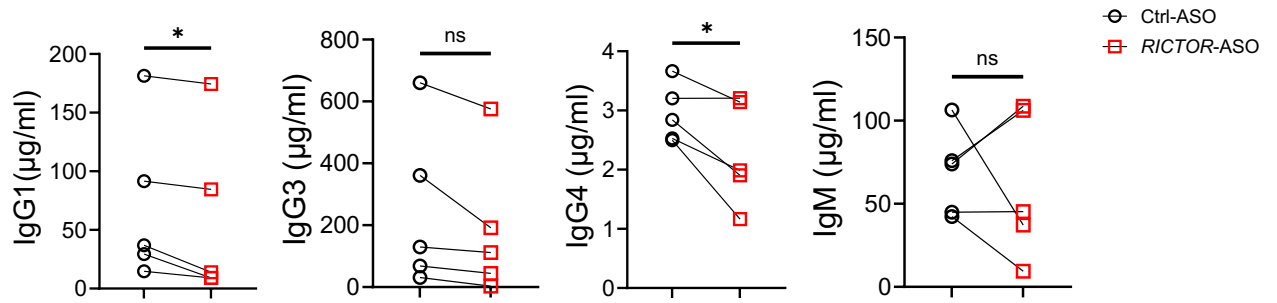

Supplement: NIHPP2024.08.01.606069v1-supplement-1.pdf [file NIHPP2024.08.01.606069v1-supplement-1.pdf]
